# Supplementary material for: Blood hsa-miR-122-5p and hsa-miR-885-5p levels associate with fatty liver and related lipoprotein metabolism—The Young Finns Study
Source: PubMed Central journal article supplement (PMC5137183; doi:10.1038/srep38262), 2016-12-05
Supplement: srep38262-s1.pdf [file srep38262-s1.pdf]

## Supplementary material

### Blood hsa-miR-122-5p and hsa-miR-885-5p levels associate with fatty liver and related lipoprotein metabolism<sup>3/4</sup> The Young Finns Study

Emma Raitoharju, Ilkka Seppälä, Leo-Pekka Lyytikäinen, Jorma Viikari, Mika Ala-Korpela, Pasi Soininen, Antti J. Kangas, Melanie Waldenberger, Norman Klopp, Thomas Illig, Jaana Leiviskä, Britt-Marie Loo, Niku Oksala, Mika Kähönen, Nina Hutri-Kähönen, Reijo Laaksonen, Olli Raitakari, Terho Lehtimäki

#### Table of contents

|                              |    |
|------------------------------|----|
| Supplementary figures .....  | 2  |
| Supplementary Figure 1 ..... | 2  |
| Supplementary Figure 2 ..... | 3  |
| Supplementary tables .....   | 4  |
| Supplementary Table 1 .....  | 4  |
| Supplementary Table 2 .....  | 8  |
| Supplementary Table 3 .....  | 9  |
| Supplementary Table 4 .....  | 10 |
| Supplementary Table 5 .....  | 12 |
| Supplementary Table 6 .....  | 13 |

## Supplementary figures

### Supplementary Figure 1. Flow and summary of the study.

**MicroRNA profiling:** TaqMan OpenArray microRNA Panels (754 miRNAs from whole blood of 871 individuals from general population, 147 with mild or clearly identified fatty liver)

Blood levels of hsa-miR-122-5p and -885-5p were significantly elevated in individuals with fatty liver

**Comparison of dysregulated miRNAs to established risk factors and biomarkers:** ROC analysis comparing dysregulated miRNAs to liver enzymes and net reclassification index analysis to discover improvement of risk stratification

Hsa-miR-122-5p was comparable to liver enzymes when detecting individuals with fatty liver. Adding hsa-miR-122-5p and -885-5p to model including classical risk factors and biomarker improved the risk stratification

**MicroRNAs and metabolic dysfunction:** Prediction metabolite levels and physiological features associated with metabolic dysfunction by fatty liver associated miRNAs

Hsa-miR-122-5p levels predicted significantly the levels of small VLDL and large LDL components and hsa-miR-885-5p levels predicted the levels of extra large HDL cholesterol

**MicroRNA target search:** Correlations between dysregulated miRNAs and predicted mRNA targets. MiRGator 3.0 used in target prediction.

Hsa-miR-885-5p was found to correlate significantly and inversely with its target OSBPL2

**Supplementary Figure 2.** Blood levels of hsa-miR-122-5p (A) and hsa-miR-885-5p (B) in individuals without fatty liver (NL), or with mild (FL<sub>M</sub>) or clearly identified fatty liver (FL<sub>C</sub>) separately for those with and without excess alcohol consumption (>20g of ethanol per day) to represent alcoholic and non-alcoholic fatty liver.

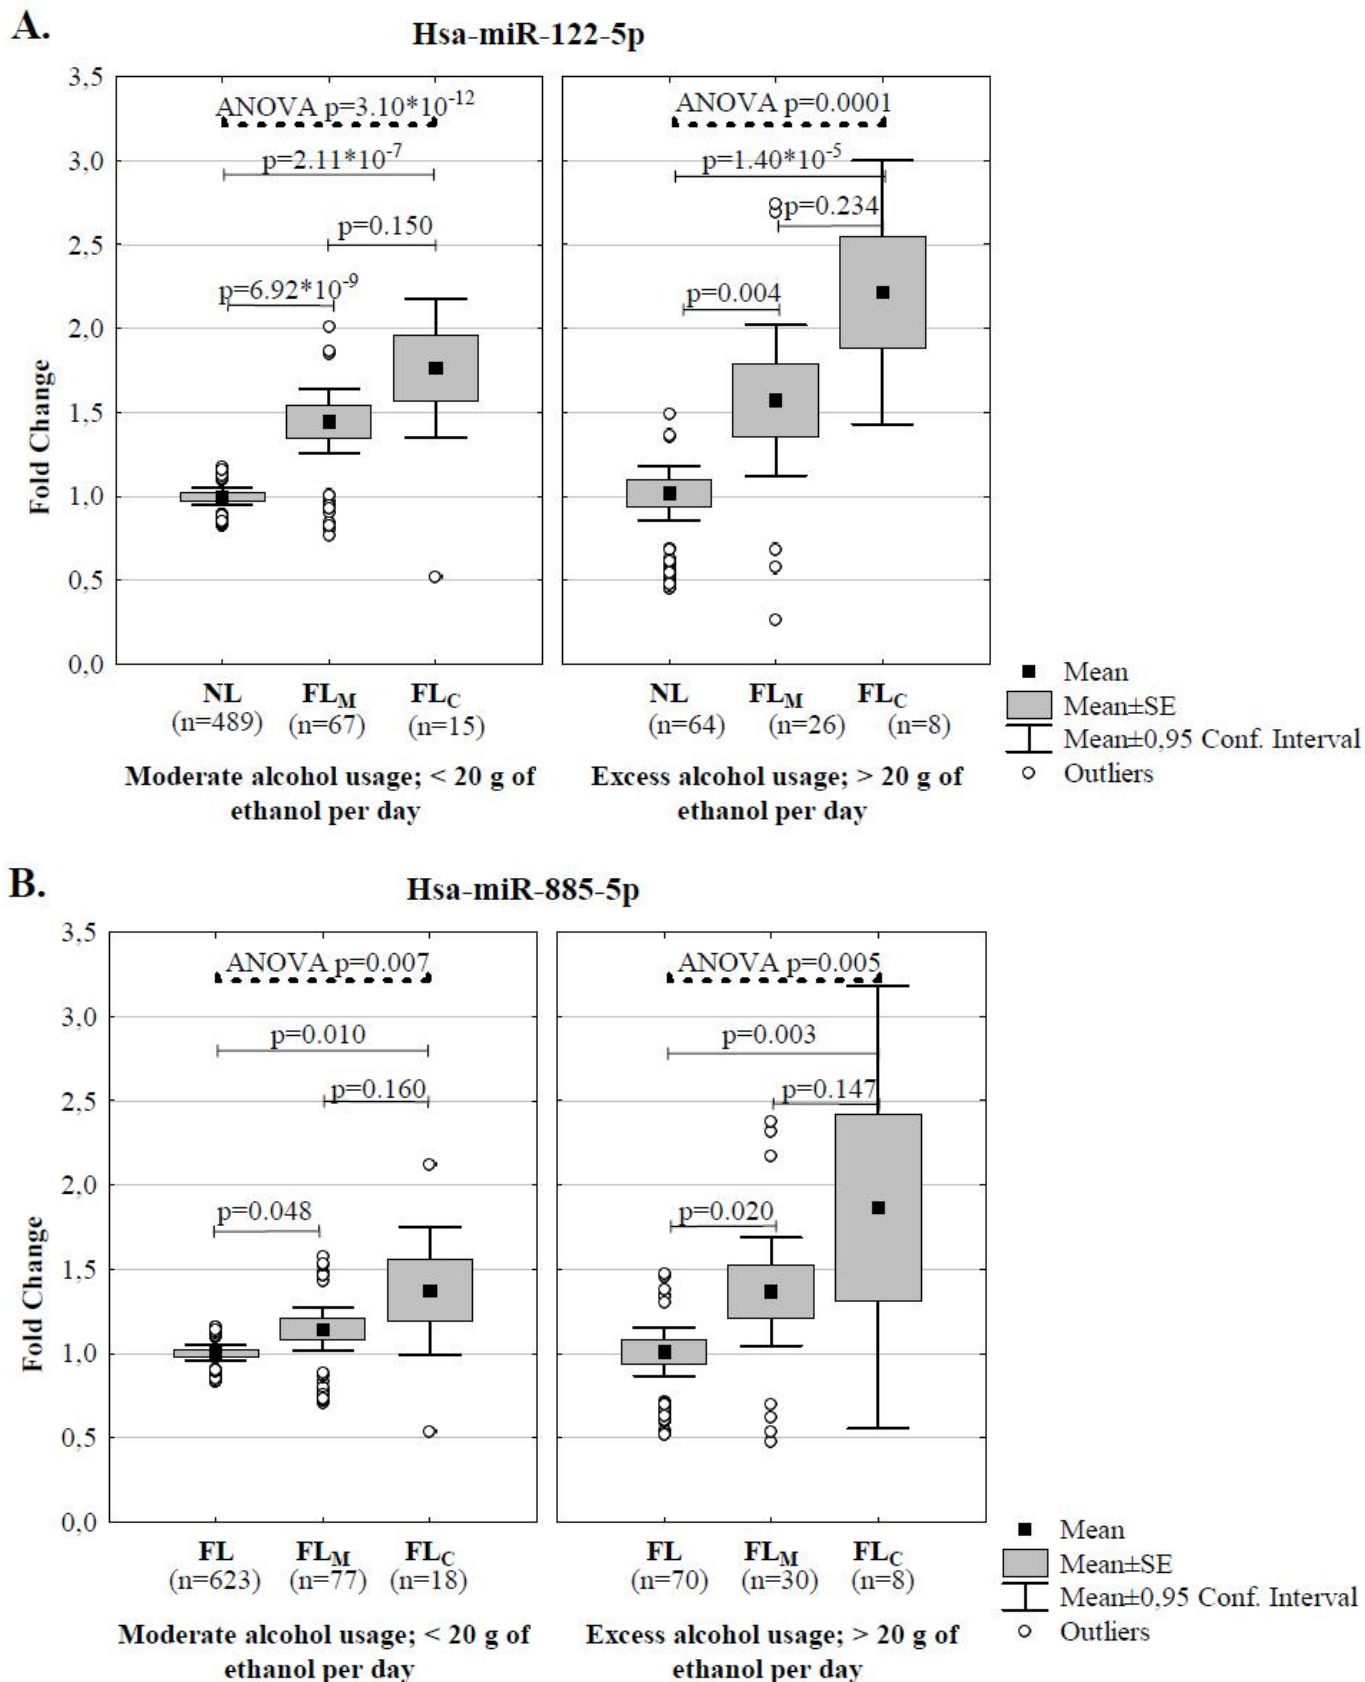

**Abbreviations:** ANOVA = Analysis of variance, SE = standard error.

## Supplementary tables

**Supplementary Table 1.** List of metabolites and conventional biochemical and anthropometric measurements correlated with miRNA expression.

| Metabolite/measurement                         | Unit   | Mean                  | Standard deviation    | Analysis Method |
|------------------------------------------------|--------|-----------------------|-----------------------|-----------------|
| <b>Lipoprotein particle concentrations</b>     |        |                       |                       |                 |
| Extremely large VLDL                           | μmol/L | 7.38*10 <sup>-5</sup> | 1.07*10 <sup>-4</sup> | NMR             |
| Very large VLDL                                | μmol/L | 4.14*10 <sup>-4</sup> | 6.64*10 <sup>-4</sup> | NMR             |
| Large VLDL                                     | μmol/L | 3.8*10 <sup>-4</sup>  | 4.35*10 <sup>-3</sup> | NMR             |
| Medium VLDL                                    | μmol/L | 0.02                  | 0.01                  | NMR             |
| Small VLDL                                     | μmol/L | 0.03                  | 0.01                  | NMR             |
| Very small VLDL                                | μmol/L | 0.04                  | 0.01                  | NMR             |
| IDL                                            | μmol/L | 0.10                  | 0.02                  | NMR             |
| Large LDL                                      | μmol/L | 0.17                  | 0.04                  | NMR             |
| Medium LDL                                     | μmol/L | 0.14                  | 0.04                  | NMR             |
| Small LDL                                      | μmol/L | 0.15                  | 0.04                  | NMR             |
| Very large HDL                                 | μmol/L | 0.32                  | 0.21                  | NMR             |
| Large HDL                                      | μmol/L | 1.11                  | 0.51                  | NMR             |
| Medium HDL                                     | μmol/L | 1.98                  | 0.37                  | NMR             |
| Small HDL                                      | μmol/L | 4.66                  | 0.45                  | NMR             |
| <b>Lipoprotein lipid concentrations</b>        |        |                       |                       |                 |
| Extremely large VLDL                           | mmol/L | 0.01                  | 0.02                  | NMR             |
| Very large VLDL                                | mmol/L | 0.04                  | 0.07                  | NMR             |
| Large VLDL                                     | mmol/L | 0.22                  | 0.26                  | NMR             |
| Medium VLDL                                    | mmol/L | 0.55                  | 0.40                  | NMR             |
| Small VLDL                                     | mmol/L | 0.61                  | 0.27                  | NMR             |
| Very small VLDL                                | mmol/L | 0.52                  | 0.15                  | NMR             |
| IDL                                            | mmol/L | 1.22                  | 0.30                  | NMR             |
| Large LDL                                      | mmol/L | 1.53                  | 0.39                  | NMR             |
| Medium LDL                                     | mmol/L | 0.91                  | 0.24                  | NMR             |
| Small LDL                                      | mmol/L | 0.56                  | 0.16                  | NMR             |
| Very large HDL                                 | mmol/L | 0.37                  | 0.24                  | NMR             |
| Large HDL                                      | mmol/L | 0.84                  | 0.41                  | NMR             |
| Medium HDL                                     | mmol/L | 1.06                  | 0.20                  | NMR             |
| Small HDL                                      | mmol/L | 1.27                  | 0.14                  | NMR             |
| <b>Lipoprotein phospholipid concentrations</b> |        |                       |                       |                 |
| Total                                          | mmol/L | 0.85                  | 0.20                  | NMR             |
| Extremely large VLDL                           | mmol/L | 0.001                 | 0.002                 | NMR             |
| Very large VLDL                                | mmol/L | 0.01                  | 0.01                  | NMR             |
| Large VLDL                                     | mmol/L | 0.04                  | 0.05                  | NMR             |
| Medium VLDL                                    | mmol/L | 0.11                  | 0.07                  | NMR             |
| Small VLDL                                     | mmol/L | 0.14                  | 0.06                  | NMR             |
| Very small VLDL                                | mmol/L | 0.16                  | 0.05                  | NMR             |
| IDL                                            | mmol/L | 0.34                  | 0.08                  | NMR             |
| Large LDL                                      | mmol/L | 0.37                  | 0.08                  | NMR             |
| Medium LDL                                     | mmol/L | 0.23                  | 0.05                  | NMR             |
| Very large HDL                                 | mmol/L | 0.20                  | 0.13                  | NMR             |
| Large HDL                                      | mmol/L | 0.43                  | 0.18                  | NMR             |
| Medium HDL                                     | mmol/L | 0.49                  | 0.09                  | NMR             |
| <b>Cholesterol</b>                             |        |                       |                       |                 |
| Total                                          | mmol/L | 5.15                  | 0.91                  | Biochemical     |
| Total                                          | mmol/L | 5.04                  | 0.97                  | NMR             |
| Large VLDL                                     | mmol/L | 0.04                  | 0.05                  | NMR             |

|                                  |        |      |      |             |
|----------------------------------|--------|------|------|-------------|
| Medium VLDL                      | mmol/L | 0.15 | 0.09 | NMR         |
| Small VLDL                       | mmol/L | 0.23 | 0.09 | NMR         |
| IDL                              | mmol/L | 0.75 | 0.19 | NMR         |
| IDL                              | mmol/L | 0.23 | 0.10 | Calculated  |
| LDL                              | mmol/L | 3.07 | 0.70 | Calculated  |
| Large LDL                        | mmol/L | 1.03 | 0.28 | NMR         |
| Medium LDL                       | mmol/L | 0.61 | 0.18 | NMR         |
| Small LDL                        | mmol/L | 0.36 | 0.11 | NMR         |
| Very large HDL                   | mmol/L | 0.16 | 0.11 | NMR         |
| Large HDL                        | mmol/L | 0.38 | 0.22 | NMR         |
| Medium HDL                       | mmol/L | 0.52 | 0.11 | NMR         |
| HDL                              | mmol/L | 1.3  | 0.3  | Biochemical |
| HDL                              | mmol/L | 1.63 | 0.39 | NMR         |
| HDL2                             | mmol/L | 1.10 | 0.39 | NMR         |
| HDL3                             | mmol/L | 0.53 | 0.04 | NMR         |
| LDL                              | mmol/L | 2.00 | 0.57 | NMR         |
| <b>Cholesterol esters</b>        |        |      |      |             |
| Total                            | mmol/L | 3.63 | 0.71 | NMR         |
| Large VLDL                       | mmol/L | 0.02 | 0.03 | NMR         |
| Medium VLDL                      | mmol/L | 0.08 | 0.05 | NMR         |
| Large LDL                        | mmol/L | 0.75 | 0.21 | NMR         |
| Medium LDL                       | mmol/L | 0.45 | 0.14 | NMR         |
| Very large HDL                   | mmol/L | 0.11 | 0.08 | NMR         |
| Large HDL                        | mmol/L | 0.30 | 0.17 | NMR         |
| Medium HDL                       | mmol/L | 0.42 | 0.09 | NMR         |
| <b>Free cholesterol</b>          |        |      |      |             |
| Total                            | mmol/L | 1.40 | 0.28 | NMR         |
| Large VLDL                       | mmol/L | 0.02 | 0.03 | NMR         |
| Medium VLDL                      | mmol/L | 0.06 | 0.05 | NMR         |
| Small VLDL                       | mmol/L | 0.09 | 0.04 | NMR         |
| IDL                              | mmol/L | 0.23 | 0.06 | NMR         |
| Large LDL                        | mmol/L | 0.29 | 0.07 | NMR         |
| Very large HDL                   | mmol/L | 0.05 | 0.03 | NMR         |
| Large HDL                        | mmol/L | 0.08 | 0.05 | NMR         |
| Medium HDL                       | mmol/L | 0.10 | 0.02 | NMR         |
| <b>Triglycerides</b>             |        |      |      |             |
| Total                            | mmol/L | 1.22 | 0.72 | Biochemical |
| Total                            | mmol/L | 1.29 | 0.64 | NMR         |
| VLDL                             | mmol/L | 0.80 | 0.57 | NMR         |
| VLDL                             | mmol/L | 0.70 | 0.49 | Calculated  |
| Extremely large VLDL             | mmol/L | 0.01 | 0.02 | NMR         |
| Very large VLDL                  | mmol/L | 0.03 | 0.04 | NMR         |
| Large VLDL                       | mmol/L | 0.14 | 0.16 | NMR         |
| Medium VLDL                      | mmol/L | 0.29 | 0.23 | NMR         |
| Small VLDL                       | mmol/L | 0.24 | 0.13 | NMR         |
| Very small VLDL                  | mmol/L | 0.12 | 0.04 | NMR         |
| IDL                              | mmol/L | 0.14 | 0.04 | NMR         |
| Very large HDL                   | mmol/L | 0.01 | 0.01 | NMR         |
| Small HDL                        | mmol/L | 0.05 | 0.02 | NMR         |
| <b>Lipoprotein particle size</b> |        |      |      |             |
| VLDL                             | nm     | 36.3 | 1.46 | NMR         |
| LDL                              | nm     | 23.6 | 0.16 | NMR         |
| HDL                              | nm     | 9.91 | 0.27 | NMR         |

**Apolipoproteins**

|                                     |      |       |       |             |
|-------------------------------------|------|-------|-------|-------------|
| Apolipoprotein A1                   | g/L  | 1.60  | 0.24  | Biochemical |
| Apolipoprotein A1                   | g/L  | 1.70  | 0.24  | Estimated   |
| Apolipoprotein B                    | g/L  | 1.04  | 0.27  | Biochemical |
| Apolipoprotein B                    | g/L  | 0.95  | 0.24  | Estimated   |
| Apolipoprotein B/ Apolipoprotein A1 |      | 0.57  | 0.15  | Calculated  |
| Lipoprotein (a)                     | mg/L | 164.7 | 171.0 | Biochemical |

**Glycolysis-related metabolites and hormones**

|          |          |      |      |             |
|----------|----------|------|------|-------------|
| Citrate  | μmol/L   | 0.10 | 0.02 | NMR         |
| GHb1c    | mmol/mol | 36.5 | 4.58 | Biochemical |
| GHb1c %  | %        | 5.49 | 0.42 | Calculated  |
| Glucose  | mmol/L   | 4.71 | 0.75 | NMR         |
| Glucose  | mmol/L   | 5.35 | 0.87 | Biochemical |
| Glycerol | μmol/L   | 0.10 | 0.04 | NMR         |
| Insulin  | mU/l     | 9.87 | 15.4 | Biochemical |
| Lactate  | mmol/L   | 1.46 | 0.37 | NMR         |
| Pyruvate | μmol/L   | 0.08 | 0.02 | NMR         |

**Fatty acids**

|                                                         |        |      |      |            |
|---------------------------------------------------------|--------|------|------|------------|
| Total fatty acids                                       | mmol/L | 11.0 | 2.65 | NMR        |
| Omega-3 fatty acids                                     | mmol/L | 0.42 | 0.14 | NMR        |
| Omega-6 fatty acids                                     | mmol/L | 3.68 | 0.69 | NMR        |
| Omega-9 and saturated fatty acids                       | mmol/L | 6.92 | 2.03 | NMR        |
| Linoleic acid                                           | mmol/L | 3.10 | 0.60 | NMR        |
| Other polyunsaturated fatty acids than linoleic acid    | mmol/L | 2.14 | 0.57 | NMR        |
| Docosahexaenoic acid                                    | mmol/L | 0.17 | 0.07 | NMR        |
| Monounsaturated fatty acids                             | mmol/L | 3.17 | 1.08 | NMR        |
| Omega-3 fatty acids per total fatty acids               |        | 3.86 | 1.05 | Calculated |
| Omega-6 fatty acids per total fatty acids               |        | 33.9 | 3.89 | Calculated |
| Omega-9 and saturated fatty acids per total fatty acids |        | 62.2 | 4.01 | Calculated |

**Quality of lipids and fatty acids**

|                                         |        |      |      |     |
|-----------------------------------------|--------|------|------|-----|
| Methylene groups per fatty acid         |        | 9.68 | 0.26 | NMR |
| Triglycerides per Phosphoglycerides     |        | 1.21 | 0.56 | NMR |
| Methylene groups per double bond        |        | 7.72 | 0.64 | NMR |
| Double bonds per Fatty Acids            |        | 1.26 | 0.08 | NMR |
| Bisallylic groups per double bond       |        | 0.54 | 0.03 | NMR |
| Bisallylic groups per total fatty acids |        | 0.68 | 0.08 | NMR |
| Average fatty acid chain length         |        | 18.0 | 0.24 | NMR |
| Double bond protons of mobile lipids    | mmol/L | 1.71 | 0.52 | NMR |
| Methylene groups of mobile lipids       | mmol/L | 26.3 | 12.8 | NMR |
| Methyl groups of mobile lipids          | mmol/L | 9.30 | 2.35 | NMR |
| Phosphatidylcholine and other cholines  | mmol/L | 2.00 | 0.41 | NMR |
| Sphingomyelins                          | mmol/L | 0.26 | 0.05 | NMR |

**Amino Acids**

|            |        |      |      |     |
|------------|--------|------|------|-----|
| Alanine    | μmol/L | 0.40 | 0.06 | NMR |
| Glutamine  | μmol/L | 0.60 | 0.07 | NMR |
| Glycine    | μmol/L | 0.29 | 0.06 | NMR |
| Histidine  | μmol/L | 0.07 | 0.01 | NMR |
| Isoleucine | μmol/L | 0.05 | 0.02 | NMR |
| Leucine    | μmol/L | 0.08 | 0.02 | NMR |

|                                    |                    |       |      |                  |
|------------------------------------|--------------------|-------|------|------------------|
| Phenylalanine                      | μmol/L             | 0.07  | 0.01 | NMR              |
| Tyrosine                           | μmol/L             | 0.05  | 0.01 | NMR              |
| Valine                             | μmol/L             | 0.20  | 0.04 | NMR              |
| <b>Ketones</b>                     |                    |       |      |                  |
| 3-hydroxybutyrate                  | mmol/L             | 0.10  | 0.11 | NMR              |
| Acetate                            | mmol/L             | 0.05  | 0.01 | NMR              |
| Acetoacetate                       | mmol/L             | 0.06  | 0.04 | NMR              |
| <b>Liver enzymes</b>               |                    |       |      |                  |
| Alanine aminotransferase           | U/L                | 16.9  | 12.2 | Biochemical      |
| Aspartate aminotransferase         | U/L                | 22.2  | 8.51 | Biochemical      |
| Gamma-glutamyltransferase          | U/L                | 30.6  | 28.3 | Biochemical      |
| <b>Kidney function</b>             |                    |       |      |                  |
| Creatinine                         | mmol/L             | 0.06  | 0.01 | NMR              |
| Creatinine                         | mmol/L             | 0.08  | 0.01 | Biochemical      |
| <b>Inflammatory markers</b>        |                    |       |      |                  |
| C-reactive protein                 | mg/L               | 1.56  | 2.51 | Biochemical      |
| Alpha-1 glycoprotein               | mmol/L             | 1.54  | 0.22 | NMR              |
| <b>Blood pressure</b>              |                    |       |      |                  |
| Systolic blood pressure            | mmHg               | 119.1 | 13.9 | Sphygmomanometer |
| Diastolic blood pressure           | mmHg               | 75.1  | 10.5 | Sphygmomanometer |
| <b>Anthropometric measurements</b> |                    |       |      |                  |
| Waist circumference                | cm                 | 91.3  | 13.8 | Measuring tape   |
| Hip circumference                  | cm                 | 101.6 | 9.0  | Measuring tape   |
| Waist-to-hip ratio                 | -                  | 0.90  | 0.09 | Calculated       |
| Weight                             | kg                 | 78.8  | 17.1 | Scale            |
| Height                             | cm                 | 172.4 | 9.11 | Measuring tape   |
| Body mass index                    | kg/m <sup>2</sup>  | 26.4  | 4.93 | Calculated       |
| <b>Blood count</b>                 |                    |       |      |                  |
| Erythrocytes                       | x <sup>12</sup> /L | 4.67  | 0.42 | Flow cytometry   |
| Leukocytes                         | x <sup>9</sup> /L  | 5.49  | 1.45 | Flow cytometry   |
| Thrombocytes                       | x <sup>10</sup> /L | 356.3 | 58.1 | Flow cytometry   |
| Hemoglobin                         | g/L                | 141.4 | 13.0 | Photometry       |
| Hematocrit                         | portion            | 0.42  | 0.03 | Calculated       |
| Mean cell volume                   | fl                 | 89.9  | 4.15 | Calculated       |
| Mean cell hemoglobin               | pg                 | 30.4  | 58.1 | Calculated       |
| <b>Other</b>                       |                    |       |      |                  |
| Calcium                            | mmol/L             | 2.36  | 0.08 | Biochemical      |
| Urate                              | mmol/L             | 0.27  | 0.07 | Biochemical      |
| Urea                               | mmol/L             | 0.72  | 0.03 | NMR              |

Abbreviations: HDL = high-density lipoprotein, IDL = intermediate-density lipoprotein, LDL = low-density lipoprotein, NMR = nuclear magnetic resonance spectroscopy, VLDL = very-low-density lipoprotein

**Supplementary Table 2.** Logistic regression models (1-3)\* predicting fatty liver (FL<sub>All</sub>) with hsa-miR-122-5p or -885-5p and known risk factors and biomarkers of FL in different subgroups of Young Finns Study.

| Study group                                                                                       | MODEL 1*               |                       | MODEL 2               |           | MODEL 3               |           |
|---------------------------------------------------------------------------------------------------|------------------------|-----------------------|-----------------------|-----------|-----------------------|-----------|
|                                                                                                   | miR-122                | miR-885               | miR-122               | miR-885   | miR-122               | miR-885   |
| <b>All subjects</b> (NL n=724, FL <sub>All</sub> n=147)                                           |                        |                       |                       |           |                       |           |
| n                                                                                                 | 703                    | 871                   | 701                   | 868       | 632                   | 781       |
| p-value                                                                                           | 1.26*10 <sup>-14</sup> | 3.91*10 <sup>-6</sup> | 1.29*10 <sup>-8</sup> | 0.002     | 6.84*10 <sup>-5</sup> | 0.131     |
| OR                                                                                                | 2.44                   | 1.55                  | 2.07                  | 1.41      | 1.78                  | 1.23      |
| 95% CI                                                                                            | 1.96-3.09              | 1.29-1.86             | 1.62-2.68             | 1.13-1.77 | 1.35-2.38             | 0.94-1.60 |
| <b>Women</b> (NL n =438, FL <sub>All</sub> n = 38)                                                |                        |                       |                       |           |                       |           |
| n                                                                                                 | 358                    | 476                   | 356                   | 473       | 321                   | 425       |
| p-value                                                                                           | 6.41*10 <sup>-4</sup>  | 0.034                 | 0.008                 | 0.031     | 0.010                 | 0.136     |
| OR                                                                                                | 2.03                   | 1.44                  | 1.85                  | 1.54      | 2.02                  | 1.44      |
| 95% CI                                                                                            | 1.36-3.09              | 1.03-2.03             | 1.18-3.00             | 1.05-2.31 | 1.20-3.56             | 0.90-2.37 |
| <b>Men</b> (NL n = 286, FL <sub>All</sub> n = 109)                                                |                        |                       |                       |           |                       |           |
| n                                                                                                 | 345                    | 395                   | 345                   | 395       | 311                   | 356       |
| p-value                                                                                           | 6.17*10 <sup>-10</sup> | 0.012                 | 5.01*10 <sup>-7</sup> | 0.029     | 0.001                 | 0.471     |
| OR                                                                                                | 2.49                   | 1.33                  | 2.18                  | 1.33      | 1.77                  | 1.12      |
| 95% CI                                                                                            | 1.88-3.36              | 1.07-1.68             | 1.62- 2.98            | 1.03-1.73 | 1.26-2.51             | 0.83-1.53 |
| <b>Normal weight; BMI ≤ 25</b> (NL n = 364, FL <sub>All</sub> n = 18)                             |                        |                       |                       |           |                       |           |
| n                                                                                                 | 298                    | 382                   | 298                   | 382       | 273                   | 351       |
| p-value                                                                                           | 0.001                  | 0.012                 | 0.002                 | 0.080     | 0.003                 | 0.125     |
| OR                                                                                                | 2.59                   | 1.88                  | 2.45                  | 1.64      | 3.1                   | 1.76      |
| 95% CI                                                                                            | 1.51-4.65              | 1.16-3.11             | 1.42-3.14             | 0.96-1.27 | 1.54-7.0              | 0.89-3.82 |
| <b>Overweight or obese; BMI &gt; 25</b> (NL n = 357, FL <sub>All</sub> n = 134 )                  |                        |                       |                       |           |                       |           |
| n                                                                                                 | 403                    | 486                   | 403                   | 486       | 359                   | 430       |
| p-value                                                                                           | 4.06*10 <sup>-9</sup>  | 1.18*10 <sup>-4</sup> | 2.22*10 <sup>-6</sup> | 0.014     | 0.003                 | 0.191     |
| OR                                                                                                | 2.15                   | 1.52                  | 1.92                  | 1.35      | 1.57                  | 1.2       |
| 95% CI                                                                                            | 1.68-2.79              | 1.23-1.88             | 1.47-2.53             | 1.06-1.71 | 1.17-2.13             | 0.91-1.59 |
| <b>Moderate alcohol usage; &lt; 20 g of ethanol per day</b> (NL n =623, FL <sub>All</sub> n = 95) |                        |                       |                       |           |                       |           |
| n                                                                                                 | 571                    | 718                   | 569                   | 715       | 542                   | 681       |
| p-value                                                                                           | 4.98*10 <sup>-10</sup> | 8.82*10 <sup>-4</sup> | 4.71*10 <sup>-6</sup> | 0.057     | 0.001                 | 0.523     |
| OR                                                                                                | 2.35                   | 1.46                  | 2.03                  | 1.30      | 1.75                  | 1.10      |
| 95% CI                                                                                            | 1.81-3.09              | 1.17-1.82             | 1.51-2.77             | 0.99-1.70 | 1.28-2.44             | 0.82-1.49 |
| <b>Excess alcohol usage; ≥ 20 g of ethanol per day</b> (NL n = 70, FL <sub>All</sub> n = 38)      |                        |                       |                       |           |                       |           |
| n                                                                                                 | 98                     | 108                   | 98                    | 108       | 90                    | 100       |
| p-value                                                                                           | 2.60*10 <sup>-4</sup>  | 0.004                 | 0.002                 | 0.006     | 0.059                 | 0.016     |
| OR                                                                                                | 2.75                   | 1.95                  | 2.64                  | 2.07      | 2.03                  | 2.08      |
| 95% CI                                                                                            | 1.66-4.95              | 1.27-3.15             | 1.51-5.12             | 1.26-3.61 | 1.02-4.59             | 1.18-3.94 |

**MODEL 1:** \*Stepwise logistic regression model predicting liver status with hsa-miR-122-5p or hsa-miR-885-5p (one by one forced into model).

**MODEL 2:** Model 1+ age, sex (sex not included in the sex specific analysis) and BMI.

**MODEL 3:** Model 2 + alcohol consumption, waist circumference, apolipoprotein B levels, triglycerides, insulin levels, systolic blood pressure, smoking, and physical activity index. Model involves all the explanatory variables that have been previously associated with liver status in Young Finns Study [see ref. 6] excluding liver enzymes due to high correlation with studied miRNAs.

**Abbreviations:** NL = normal liver, FL<sub>All</sub> = all subjects with fatty liver.



**Supplementary Table 3.** Continuous net reclassification improvement (NRI) of risk stratification of fatty liver after adding hsa-miR-122-5p and hsa-885-5p to the base model\* of conventional risk factors.

| <b>Subgroup/modeling</b>                                | <b>AUC</b> | <b>NRI (95% CI)</b>     | <b>p-value</b> |
|---------------------------------------------------------|------------|-------------------------|----------------|
| <b>Men</b> (NL n=226, FL <sub>All</sub> , n=85)         |            |                         |                |
| Model*                                                  | 0.849      | Reference               | Reference      |
| + hsa-miR-122-5p                                        | 0.850      | 0.188 (-0.059 - 0.436)  | 0.14           |
| + hsa-miR-885-5p                                        | 0.849      | 0.059 (-0.190 - 0.308)  | 0.64           |
| + hsa-miR-122-5p and hsa-miR-885-5p                     | 0.853      | 0.383 (0.142 - 0.624)   | 0.0019         |
| <b>Women</b> (NL n=298, FL <sub>All</sub> , n=23)       |            |                         |                |
| Model                                                   | 0.933      | Reference               | Reference      |
| + hsa-miR-122-5p                                        | 0.937      | 0.291 (-0.115 - 0.696)  | 0.16           |
| + hsa-miR-885-5p                                        | 0.933      | -0.097 (-0.518 - 0.324) | 0.65           |
| + hsa-miR-122-5p and hsa-miR-885-5p                     | 0.936      | 0.445 (0.068 - 0.821)   | 0.021          |
| <b>BMI ≤ 25</b> (NL n=260, FL <sub>All</sub> , n=13)    |            |                         |                |
| Model                                                   | 0.901      | Reference               | Reference      |
| + hsa-miR-122-5p                                        | 0.905      | 0.169 (-0.373 - 0.712)  | 0.54           |
| + hsa-miR-885-5p                                        | 0.899      | 0.162 (-0.381 - 0.704)  | 0.56           |
| + hsa-miR-122-5p and hsa-miR-885-5p                     | 0.906      | 0.200 (-0.343 - 0.743)  | 0.47           |
| <b>BMI &gt; 25</b> (NL n=264, FL <sub>All</sub> , n=95) |            |                         |                |
| Model                                                   | 0.857      | Reference               | Reference      |
| + hsa-miR-122-5p                                        | 0.860      | 0.112 (-0.120 - 0.345)  | 0.34           |
| + hsa-miR-885-5p                                        | 0.858      | 0.067 (-0.1672 - 0.301) | 0.58           |
| + hsa-miR-122-5p and hsa-miR-885-5p                     | 0.860      | 0.131 (-0.102 - 0.364)  | 0.27           |

**\*Statistical model:** Stepwise regression model consisting of variables associated with FL in the Young Finns Study [see ref 6]. **Abbreviations:** AUC = area under curve, NL = normal liver, FL<sub>All</sub> = all subjects with fatty liver, ALT = Alanine aminotransferase, GT = gamma-glutamyltransferase.

**Supplementary Table 4.** Associations of hsa-miR-122-5p and hsa-miR-885-5p with lipoprotein subclasses form the NMR lipo window. In the regression model\* the Betas ( $\beta$ ) indicate the standard deviation (SD) change of the metabolite levels per increase of one SD of miRNA levels. Significant p-values are indicated in bold.

| Metabolite           | Hsa-miR-122-5p |                            | Hsa-miR-885-5p |                               |
|----------------------|----------------|----------------------------|----------------|-------------------------------|
|                      | p-value        | $\beta$ (95% CI)           | p-value        | $\beta$ (95% CI)              |
| <b>Particles</b>     |                |                            |                |                               |
| XXL VLDL             | 0.815          | -0.008 (-0.077-0.060)      | 0.649          | -0.014 (-0.073-0.045)         |
| XL VLDL              | 0.224          | 0.039 (-0.024-0.101)       | 0.505          | 0.019 (-0.036-0.073)          |
| L VLDL               | 0.451          | 0.026 (-0.042-0.093)       | 0.297          | 0.032 (-0.028-0.092)          |
| M VLDL               | 0.343          | 0.035 (-0.037-0.107)       | 0.205          | 0.038 (-0.021-0.097)          |
| S VLDL               | 0.083          | 0.062 (-0.008-0.132)       | 0.183          | 0.040 (-0.019-0.098)          |
| XS VLDL              | <b>0.003</b>   | <b>0.112 (0.038-0.185)</b> | 0.650          | 0.015 (-0.051-0.082)          |
| IDL                  | <b>0.009</b>   | <b>0.102 (0.025-0.178)</b> | 0.798          | 0.009 (-0.058-0.076)          |
| L LDL                | <b>0.039</b>   | <b>0.082 (0.004-0.159)</b> | 0.998          | 0.000 (-0.067-0.067)          |
| M LDL                | 0.085          | 0.066 (-0.009-0.141)       | 0.962          | -0.002 (-0.068-0.065)         |
| S LDL                | 0.144          | 0.055 (-0.019-0.129)       | 0.673          | -0.014 (-0.080-0.052)         |
| XL HDL               | 0.231          | -0.043 (-0.112-0.027)      | <b>0.038</b>   | <b>-0.060 (-0.117--0.003)</b> |
| L HDL                | 0.142          | -0.052 (-0.120-0.017)      | 0.102          | -0.048 (-0.105-0.009)         |
| M HDL                | 0.299          | -0.043 (-0.125-0.038)      | 0.085          | -0.061 (-0.130-0.008)         |
| S HDL                | 0.396          | -0.033 (-0.110-0.044)      | 0.132          | -0.051 (-0.118-0.015)         |
| <b>Lipids</b>        |                |                            |                |                               |
| XXL VLDL             | 0.232          | 0.040 (-0.026-0.106)       | 0.870          | -0.005 (-0.062-0.053)         |
| XL VLDL              | 0.329          | 0.032 (-0.032-0.095)       | 0.540          | 0.018 (-0.038-0.074)          |
| L VLDL               | 0.398          | 0.030 (-0.040-0.101)       | 0.352          | 0.028 (-0.031-0.087)          |
| M VLDL               | 0.302          | 0.038 (-0.034-0.110)       | 0.168          | 0.042 (-0.018-0.101)          |
| S VLDL               | 0.083          | 0.063 (-0.008-0.133)       | 0.203          | 0.038 (-0.020-0.097)          |
| XS VLDL              | <b>0.004</b>   | <b>0.110 (0.036-0.184)</b> | 0.688          | 0.014 (-0.054-0.081)          |
| IDL                  | <b>0.010</b>   | <b>0.101 (0.024-0.178)</b> | 0.777          | 0.010 (-0.058-0.077)          |
| L LDL                | <b>0.043</b>   | <b>0.080 (0.003-0.158)</b> | 0.953          | 0.002 (-0.065-0.070)          |
| M LDL                | 0.090          | 0.065 (-0.010-0.140)       | 0.971          | 0.001 (-0.065-0.068)          |
| S LDL                | 0.087          | 0.067 (-0.009-0.143)       | 0.750          | -0.011 (-0.077-0.055)         |
| XL HDL               | 0.239          | -0.043 (-0.114-0.028)      | <b>0.032</b>   | <b>-0.064 (-0.122--0.006)</b> |
| L HDL                | 0.111          | -0.056 (-0.125-0.013)      | 0.084          | -0.050 (-0.107-0.007)         |
| M HDL                | 0.248          | -0.056 (-0.125-0.013)      | 0.103          | -0.058 (-0.127-0.012)         |
| S HDL                | 0.545          | -0.024 (-0.100-0.053)      | 0.212          | -0.043 (-0.110-0.024)         |
| <b>Phospholipids</b> |                |                            |                |                               |
| XXL VLDL             | 0.357          | 0.031 (-0.035-0.097)       | 0.948          | 0.002 (-0.056-0.060)          |
| XL VLDL              | 0.129          | 0.050 (-0.014-0.114)       | 0.702          | 0.011 (-0.046-0.068)          |
| L VLDL               | 0.304          | 0.037 (-0.034-0.108)       | 0.321          | 0.030 (-0.029-0.089)          |
| M VLDL               | 0.227          | 0.037 (-0.034-0.108)       | 0.161          | 0.042 (-0.017-0.101)          |
| S VLDL               | 0.054          | 0.070 (-0.001-0.142)       | 0.197          | 0.039 (-0.020-0.098)          |
| XS VLDL              | <b>0.003</b>   | <b>0.114 (0.038-0.190)</b> | 0.361          | 0.031 (-0.036-0.098)          |
| IDL                  | <b>0.026</b>   | <b>0.090 (0.011-0.169)</b> | 0.651          | 0.016 (-0.052-0.084)          |
| L LDL                | <b>0.040</b>   | <b>0.082 (0.004-0.159)</b> | 0.905          | 0.004 (-0.063-0.072)          |
| M LDL                | 0.079          | 0.066 (-0.008-0.140)       | 0.966          | -0.001 (-0.067-0.064)         |
| XL HDL               | 0.201          | -0.044 (-0.113-0.024)      | <b>0.049</b>   | <b>-0.056 (-0.112-0.000)</b>  |
| L HDL                | 0.196          | -0.046 (-0.114-0.023)      | 0.093          | -0.050 (-0.108-0.008)         |
| M HDL                | 0.271          | -0.046 (-0.127-0.035)      | 0.094          | -0.059 (-0.128-0.010)         |
| <b>Triglycerides</b> |                |                            |                |                               |
| Total                | 0.116          | 0.058 (-0.014-0.129)       | 0.396          | 0.026 (-0.034-0.085)          |
| VLDL                 | 0.197          | 0.047 (-0.024-0.117)       | 0.295          | 0.031 (-0.027-0.090)          |
| XXL VLDL             | 0.173          | 0.046 (-0.020-0.112)       | 0.783          | -0.008 (-0.066-0.050)         |
| XL VLDL              | 0.339          | 0.031 (-0.033-0.095)       | 0.550          | 0.017 (-0.039-0.073)          |
| L VLDL               | 0.521          | 0.023 (-0.048-0.094)       | 0.347          | 0.028 (-0.031-0.088)          |
| M VLDL               | 0.473          | 0.026 (-0.045-0.098)       | 0.277          | 0.033 (-0.026-0.092)          |
| S VLDL               | 0.102          | 0.058 (-0.012-0.129)       | 0.205          | 0.037 (-0.021-0.096)          |
| XS VLDL              | <b>0.010</b>   | <b>0.096 (0.023-0.169)</b> | 0.414          | 0.026 (-0.036-0.088)          |
| IDL                  | <b>0.019</b>   | <b>0.091 (0.015-0.166)</b> | 0.787          | 0.009 (-0.056-0.074)          |
| XL HDL               | 0.090          | 0.071 (-0.011-0.154)       | 0.660          | -0.015 (-0.084-0.053)         |
| S HDL                | 0.058          | 0.071 (-0.002-0.143)       | 0.213          | 0.038 (-0.022-0.099)          |
| <b>Cholesterol</b>   |                |                            |                |                               |

|                           |              |                            |              |                               |
|---------------------------|--------------|----------------------------|--------------|-------------------------------|
| Total                     | 0.185        | 0.053 (-0.025-0.131)       | 0.671        | -0.015 (-0.083-0.054)         |
| LDL                       | 0.063        | 0.072 (-0.004-0.151)       | 0.957        | 0.002 (-0.065-0.069)          |
| HDL                       | 0.099        | -0.062 (-0.136-0.012)      | <b>0.030</b> | <b>-0.069 (-0.131--0.007)</b> |
| L VLDL                    | 0.225        | 0.043 (-0.026-0.113)       | 0.248        | 0.034 (-0.024-0.092)          |
| M VLDL                    | 0.143        | 0.052 (-0.017-0.120)       | 0.106        | 0.050 (-0.011-0.110)          |
| S VLDL                    | 0.051        | 0.069 (0.000-0.138)        | 0.197        | 0.040 (-0.021-0.102)          |
| IDL                       | <b>0.015</b> | <b>0.097 (0.019-0.175)</b> | 0.667        | 0.015 (-0.053-0.083)          |
| L LDL                     | 0.050        | 0.078 (0.000-0.156)        | 0.853        | 0.006 (-0.061-0.074)          |
| M LDL                     | 0.069        | 0.071 (-0.005-0.148)       | 0.898        | 0.006 (-0.061-0.074)          |
| S LDL                     | 0.090        | 0.066 (-0.010-0.143)       | 0.856        | -0.006 (-0.073-0.060)         |
| XL HDL                    | 0.326        | -0.037 (-0.112-0.037)      | <b>0.031</b> | <b>-0.067 (-0.128--0.006)</b> |
| L HDL                     | 0.078        | -0.062 (-0.131-0.007)      | 0.053        | -0.056 (-0.113-0.001)         |
| M HDL                     | 0.174        | -0.057 (-0.138-0.025)      | 0.061        | -0.066 (-0.135-0.003)         |
| <b>Cholesterol esters</b> |              |                            |              |                               |
| L VLDL                    | 0.261        | 0.040 (-0.030-0.111)       | 0.148        | 0.043 (-0.015-0.101)          |
| M VLDL                    | 0.101        | 0.059 (-0.012-0.130)       | 0.099        | 0.052 (-0.010-0.114)          |
| L LDL                     | 0.051        | 0.077 (0.000-0.155)        | 0.816        | 0.008 (-0.059-0.075)          |
| M LDL                     | 0.067        | 0.071 (-0.005-0.148)       | 0.816        | 0.008 (-0.058-0.074)          |
| XL HDL                    | 0.337        | -0.037 (-0.112-0.038)      | <b>0.026</b> | <b>-0.070 (-0.131--0.008)</b> |
| L HDL                     | 0.060        | -0.067 (-0.138-0.003)      | 0.062        | -0.055 (-0.112-0.003)         |
| M HDL                     | 0.138        | -0.062 (-0.143-0.020)      | <b>0.048</b> | <b>-0.070 (-0.139--0.001)</b> |
| <b>Free cholesterol</b>   |              |                            |              |                               |
| L VLDL                    | 0.301        | 0.034 (-0.031-0.099)       | 0.453        | 0.022 (-0.036-0.080)          |
| M VLDL                    | 0.184        | 0.049 (-0.023-0.121)       | 0.137        | 0.045 (-0.014-0.105)          |
| S VLDL                    | <b>0.017</b> | <b>0.086 (0.016-0.157)</b> | 0.185        | 0.040 (-0.019-0.100)          |
| IDL                       | <b>0.013</b> | <b>0.099 (0.021-0.177)</b> | 0.409        | 0.029 (-0.039-0.097)          |
| L LDL                     | <b>0.034</b> | <b>0.085 (0.007-0.164)</b> | 0.811        | 0.008 (-0.061-0.078)          |
| XL HDL                    | 0.290        | -0.039 (-0.111-0.033)      | <b>0.026</b> | <b>-0.067 (-0.126--0.008)</b> |
| L HDL                     | 0.237        | -0.041 (-0.108-0.027)      | 0.090        | -0.048 (-0.104-0.007)         |
| M HDL                     | 0.464        | -0.031 (-0.113-0.051)      | 0.199        | -0.046 (-0.115-0.024)         |
| <b>Apolipoproteins</b>    |              |                            |              |                               |
| ApoA1                     | 0.427        | -0.033 (-0.113-0.048)      | 0.062        | -0.065 (-0.133-0.003)         |
| ApoB                      | <b>0.020</b> | <b>0.086 (0.014-0.158)</b> | 0.428        | 0.026 (-0.038-0.090)          |
| ApoA1/ApoB                | <b>0.006</b> | <b>0.095 (0.027-0.163)</b> | 0.110        | 0.048 (-0.011-0.107)          |

**\*Statistical model:** Stepwise linear (AIC) regression model with individual miRNA (one by one forced into model) age, sex, BMI, liver status, ALT, AST and GT are used to predict NMR metabolite levels. **Note:** individuals with ALT, AST and GT levels over the Finnish reference ranges were removed from the analysis. **Abbreviations:** XL=extra large, L=large, M=medium, S=small, XS=extra small, HDL=high density lipoprotein, LDL=low density lipoprotein, IDL=intermediate density lipoprotein, VLDL=very low density lipoprotein. ALT=alanine aminotransferase AST= aspartate aminotransferase, GT=gamma-glutamyltransferase.

**Supplementary Table 5.** Associations between levels of hsa-miR-885-5p and its *in silico* predicted mRNA target expression levels from transcriptomics analysis. In the regression model the Betas (b) presents the standard error (SD) increment of the target mRNA levels per increase of one SD of miRNA levels.

| Gene ID  | Accession ID   | Spearman correlation |          |        | Linear regression model* |         |         |         |   |        |
|----------|----------------|----------------------|----------|--------|--------------------------|---------|---------|---------|---|--------|
|          |                | n                    | p-value  | r      | n                        | p-value | $\beta$ | CI(95%) |   |        |
| GABARAP  | NM_007278.1    | 740                  | 0.032    | -0.079 | 712                      | 0.002   | -0.120  | -0.194  | - | -0.046 |
| ARSA     | NM_000487.3    | 740                  | 0.022    | -0.084 | 712                      | 0.005   | -0.111  | -0.188  | - | -0.035 |
| AHNAK    | NM_024060.2    | 740                  | 3.20E-05 | 0.152  | 712                      | 0.013   | 0.094   | 0.020   | - | 0.168  |
| RSPH3    | NM_031924.3    | 740                  | 0.002    | -0.111 | 712                      | 0.014   | -0.094  | -0.169  | - | -0.019 |
| OSBPL2   | NM_144498.1    | 740                  | 1.00E-04 | -0.143 | 712                      | 0.015   | -0.095  | -0.171  | - | -0.019 |
| UQCC     | NM_199487.1    | 740                  | 0.001    | 0.126  | 712                      | 0.015   | 0.095   | 0.019   | - | 0.172  |
| HNRNPL   | NM_001005335.1 | 740                  | 0.032    | 0.079  | 712                      | 0.018   | 0.091   | 0.016   | - | 0.166  |
| TRO      | NM_001039705.1 | 740                  | 4.60E-05 | 0.149  | 712                      | 0.019   | 0.092   | 0.015   | - | 0.169  |
| FCRL6    | NM_001004310.1 | 740                  | 0.041    | 0.075  | 712                      | 0.022   | 0.093   | 0.014   | - | 0.172  |
| APOL3    | NM_030644.1    | 740                  | 0.001    | 0.118  | 712                      | 0.022   | 0.088   | 0.013   | - | 0.164  |
| PPP2R1A  | NM_014225.3    | 740                  | 0.005    | 0.102  | 712                      | 0.028   | 0.087   | 0.010   | - | 0.165  |
| AGPAT4   | NM_001012734.1 | 740                  | 0.004    | 0.104  | 712                      | 0.066   | 0.071   | -0.004  | - | 0.146  |
| RNPEPL1  | NM_018226.3    | 740                  | 0.012    | 0.092  | 712                      | 0.084   | 0.066   | -0.009  | - | 0.142  |
| DHRS4    | NM_021004.2    | 740                  | 0.009    | 0.096  | 712                      | 0.110   | 0.064   | -0.014  | - | 0.143  |
| HBP1     | NM_012257.3    | 740                  | 0.014    | -0.090 | 712                      | 0.152   | -0.055  | -0.131  | - | 0.020  |
| YWHAE    | NM_006761.3    | 740                  | 0.007    | 0.098  | 712                      | 0.153   | 0.057   | -0.021  | - | 0.134  |
| PVRL2    | NM_002856.1    | 740                  | 0.002    | -0.115 | 712                      | 0.182   | -0.053  | -0.131  | - | 0.025  |
| VPS37C   | NM_017966.4    | 740                  | 0.032    | -0.079 | 712                      | 0.186   | -0.050  | -0.124  | - | 0.024  |
| HINT3    | NM_138571.4    | 740                  | 0.036    | -0.077 | 712                      | 0.188   | -0.053  | -0.133  | - | 0.026  |
| ZNF562   | NM_017656.1    | 740                  | 0.019    | 0.086  | 712                      | 0.189   | 0.052   | -0.025  | - | 0.129  |
| AHNAK    | NM_001620.1    | 740                  | 0.005    | 0.102  | 712                      | 0.237   | 0.045   | -0.030  | - | 0.119  |
| RNASEL   | NM_021133.2    | 740                  | 0.024    | -0.083 | 712                      | 0.242   | -0.044  | -0.118  | - | 0.030  |
| FPR2     | NM_001462.3    | 740                  | 0.003    | -0.108 | 712                      | 0.271   | -0.042  | -0.116  | - | 0.033  |
| SPAG9    | NM_003971.3    | 740                  | 0.015    | -0.090 | 712                      | 0.287   | -0.193  | -0.115  | - | 0.034  |
| KIAA1598 | NM_018330.3    | 740                  | 0.003    | 0.108  | 712                      | 0.288   | 0.042   | -0.035  | - | 0.118  |
| SPAG9    | NM_172345.1    | 740                  | 0.034    | -0.078 | 712                      | 0.364   | -0.035  | -0.112  | - | 0.041  |
| RUSC1    | NM_014328.2    | 740                  | 0.043    | 0.074  | 712                      | 0.374   | 0.035   | -0.042  | - | 0.111  |
| TMEM71   | NM_144649.1    | 740                  | 0.001    | -0.125 | 712                      | 0.376   | -0.034  | -0.108  | - | 0.041  |
| TNFSF8   | NM_001244.2    | 740                  | 0.023    | -0.084 | 712                      | 0.388   | -0.034  | -0.112  | - | 0.044  |
| TBCD     | NM_005993.3    | 740                  | 0.020    | 0.086  | 712                      | 0.413   | 0.032   | -0.045  | - | 0.109  |
| TPMT     | NM_000367.2    | 740                  | 0.049    | 0.072  | 712                      | 0.422   | 0.031   | -0.045  | - | 0.108  |
| ZXDC     | NM_025112.3    | 740                  | 0.016    | -0.088 | 712                      | 0.477   | -0.028  | -0.105  | - | 0.049  |
| SLC2A6   | NM_017585.2    | 740                  | 0.004    | 0.105  | 712                      | 0.609   | 0.020   | -0.056  | - | 0.096  |
| MXD1     | NM_002357.2    | 740                  | 0.003    | -0.107 | 712                      | 0.640   | -0.017  | -0.090  | - | 0.055  |
| FPR2     | NM_001462.3    | 740                  | 0.009    | -0.096 | 712                      | 0.640   | -0.018  | -0.093  | - | 0.057  |
| ADD1     | NM_001119.3    | 740                  | 0.040    | 0.075  | 712                      | 0.650   | -0.018  | -0.093  | - | 0.058  |
| EIF1AX   | NM_001412.3    | 740                  | 0.050    | -0.072 | 712                      | 0.650   | -0.018  | -0.095  | - | 0.059  |
| PGS1     | NM_024419.3    | 740                  | 0.018    | -0.087 | 712                      | 0.667   | -0.016  | -0.092  | - | 0.059  |
| AQP9     | NM_020980.2    | 740                  | 0.016    | -0.089 | 712                      | 0.697   | 0.014   | -0.058  | - | 0.087  |
| KLHL6    | NM_130446.1    | 740                  | 0.015    | -0.089 | 712                      | 0.703   | -0.015  | -0.092  | - | 0.062  |
| ZC3HAV1  | NM_020119.3    | 740                  | 0.050    | -0.072 | 712                      | 0.774   | -0.011  | -0.085  | - | 0.063  |
| RPGR     | NM_001023582.1 | 740                  | 0.020    | -0.086 | 712                      | 0.783   | -0.011  | -0.086  | - | 0.065  |
| RBM33    | NM_001008408.1 | 740                  | 0.004    | -0.106 | 712                      | 0.898   | -0.005  | -0.081  | - | 0.071  |
| USP9X    | NM_004652.3    | 740                  | 0.002    | -0.115 | 712                      | 0.926   | 0.004   | -0.071  | - | 0.078  |
| PROK2    | NM_021935.2    | 740                  | 3.21E-04 | -0.132 | 712                      | 0.930   | 0.003   | -0.066  | - | 0.073  |
| SPAG9    | NM_003971.3    | 740                  | 0.015    | -0.090 | 712                      | 0.949   | -0.002  | -0.078  | - | 0.073  |
| TMEM19   | NM_018279.2    | 740                  | 0.024    | 0.083  | 712                      | 0.993   | 0.000   | -0.076  | - | 0.076  |
| RNASEL   | NM_021133.2    | 740                  | 0.017    | -0.087 | 712                      | 0.994   | 0.000   | -0.073  | - | 0.074  |

\***Model:** Stepwise linear regression model with hsa-miR-885-5p (forced in the model), age, sex, BMI, liver status, alanine aminotransferase (ALT), aspartate aminotransferase (AST) and gamma-glutamyltransferase (GT). **Note:** Individuals with ALT, AST or GT levels over the Finnish reference ranges were discarded from the analysis.

**Supplementary Table 6.** Associations between levels of hsa-miR-122-5p and its *in silico* predicted mRNA target expression levels from transcriptomics analysis. In the regression model the betas (b) presents the standard deviation (SD) increment of the target mRNA levels per increase of one SD of miRNA levels.

| Gene ID  | Accession ID   | Spearman correlation |         |        | Linear regression model* |         |         |         |   |        |
|----------|----------------|----------------------|---------|--------|--------------------------|---------|---------|---------|---|--------|
|          |                | n                    | p-value | r      | n                        | p-value | $\beta$ | CI(95%) |   |        |
| SUSD1    | NM_022486.3    | 616                  | 0.001   | 0.138  | 586                      | 0.042   | 0.085   | 0.003   | - | 0.167  |
| PSEN2    | NM_012486.1    | 616                  | 0.001   | 0.128  | 586                      | 0.143   | 0.062   | -0.021  | - | 0.144  |
| CS       | NM_004077.2    | 616                  | 0.002   | 0.122  | 586                      | 0.005   | 0.131   | 0.041   | - | 0.222  |
| TRAK1    | NM_014965.2    | 616                  | 0.002   | 0.123  | 586                      | 0.009   | 0.122   | 0.031   | - | 0.213  |
| CANX     | NM_001024649.1 | 616                  | 0.003   | 0.118  | 586                      | 0.037   | 0.097   | 0.006   | - | 0.188  |
| RBM28    | NM_018077.1    | 616                  | 0.003   | 0.120  | 586                      | 0.054   | 0.083   | -0.001  | - | 0.166  |
| PTP4A1   | NM_003463.3    | 616                  | 0.004   | 0.114  | 586                      | 0.011   | 0.113   | 0.026   | - | 0.200  |
| NONO     | NM_007363.3    | 616                  | 0.004   | 0.117  | 586                      | 0.736   | 0.016   | -0.075  | - | 0.106  |
| GBP4     | NM_052941.2    | 616                  | 0.006   | 0.111  | 586                      | 0.139   | 0.063   | -0.020  | - | 0.146  |
| CS       | NM_004077.2    | 616                  | 0.006   | 0.111  | 586                      | 0.141   | 0.066   | -0.022  | - | 0.155  |
| UBQLN1   | NM_053067.1    | 616                  | 0.007   | 0.108  | 586                      | 0.135   | 0.065   | -0.020  | - | 0.150  |
| FBXO7    | NM_012179.3    | 616                  | 0.007   | 0.109  | 586                      | 0.947   | -0.003  | -0.092  | - | 0.086  |
| CANX     | NM_001024649.1 | 616                  | 0.008   | 0.107  | 586                      | 0.202   | 0.055   | -0.029  | - | 0.138  |
| RALGAPA1 | NM_194301.2    | 616                  | 0.008   | -0.107 | 586                      | 0.311   | -0.043  | -0.127  | - | 0.041  |
| TTYH3    | NM_025250.2    | 616                  | 0.008   | 0.107  | 586                      | 0.373   | 0.040   | -0.048  | - | 0.128  |
| PKM2     | NM_182471.1    | 616                  | 0.008   | 0.107  | 586                      | 0.614   | -0.023  | -0.113  | - | 0.067  |
| TCN2     | NM_000355.2    | 616                  | 0.009   | 0.105  | 586                      | 0.494   | 0.030   | -0.056  | - | 0.115  |
| DOPEY2   | NM_005128.2    | 616                  | 0.010   | 0.103  | 586                      | 0.171   | 0.063   | -0.027  | - | 0.154  |
| FAM84B   | NM_174911.3    | 616                  | 0.010   | 0.104  | 586                      | 0.626   | -0.022  | -0.113  | - | 0.068  |
| MED26    | NM_004831.3    | 616                  | 0.011   | 0.102  | 586                      | 0.060   | 0.080   | -0.003  | - | 0.163  |
| ZDHHC24  | NM_207340.1    | 616                  | 0.011   | 0.102  | 586                      | 0.341   | 0.044   | -0.046  | - | 0.134  |
| SELENBP1 | NM_003944.2    | 616                  | 0.011   | 0.103  | 586                      | 0.527   | -0.028  | -0.114  | - | 0.059  |
| OSBP2    | NM_030758.3    | 616                  | 0.011   | 0.103  | 586                      | 0.875   | 0.007   | -0.083  | - | 0.097  |
| RBM47    | NM_019027.3    | 616                  | 0.012   | -0.101 | 586                      | 0.836   | 0.009   | -0.075  | - | 0.092  |
| EIF1AX   | NM_001412.3    | 616                  | 0.014   | -0.099 | 586                      | 0.016   | -0.111  | -0.201  | - | -0.021 |
| HMGNI    | NM_004965.6    | 616                  | 0.015   | -0.098 | 586                      | 0.169   | -0.059  | -0.144  | - | 0.025  |
| PIP4K2A  | NM_005028.4    | 616                  | 0.015   | 0.098  | 586                      | 0.328   | 0.046   | -0.046  | - | 0.138  |
| ABCC5    | NM_001023587.1 | 616                  | 0.015   | -0.098 | 586                      | 0.351   | -0.040  | -0.124  | - | 0.044  |
| LAMC1    | NM_002293.2    | 616                  | 0.016   | 0.097  | 586                      | 0.018   | 0.103   | 0.018   | - | 0.188  |
| LUC7L    | NM_018032.3    | 616                  | 0.016   | -0.097 | 586                      | 0.130   | -0.064  | -0.147  | - | 0.019  |
| TGM3     | NM_003245.2    | 616                  | 0.016   | -0.097 | 586                      | 0.182   | -0.054  | -0.133  | - | 0.025  |
| PRPF38B  | NM_018061.1    | 616                  | 0.017   | -0.096 | 586                      | 0.922   | -0.004  | -0.090  | - | 0.082  |
| FAM172A  | NM_032042.4    | 616                  | 0.018   | -0.095 | 586                      | 0.133   | -0.068  | -0.157  | - | 0.021  |
| FBXO7    | NM_001033024.1 | 616                  | 0.018   | 0.095  | 586                      | 0.534   | 0.027   | -0.058  | - | 0.112  |
| SLC1A5   | NM_005628.1    | 616                  | 0.019   | 0.094  | 586                      | 0.482   | -0.032  | -0.120  | - | 0.057  |
| SORT1    | NM_002959.4    | 616                  | 0.020   | 0.094  | 586                      | 0.031   | 0.099   | 0.009   | - | 0.189  |
| NEXN     | NM_144573.1    | 616                  | 0.020   | 0.094  | 586                      | 0.411   | 0.035   | -0.048  | - | 0.118  |
| GUCY1A3  | NM_000856.2    | 616                  | 0.022   | 0.093  | 586                      | 0.634   | 0.021   | -0.065  | - | 0.106  |
| SLC25A5  | NM_001152.1    | 616                  | 0.023   | 0.091  | 586                      | 0.114   | 0.067   | -0.016  | - | 0.150  |
| FNDC3A   | NM_001079673.1 | 616                  | 0.023   | -0.092 | 586                      | 0.276   | -0.047  | -0.132  | - | 0.038  |
| TMEM39B  | NM_018056.1    | 616                  | 0.024   | 0.091  | 586                      | 0.529   | 0.029   | -0.060  | - | 0.118  |
| TIAL1    | NM_003252.3    | 616                  | 0.025   | -0.090 | 586                      | 0.782   | -0.013  | -0.103  | - | 0.078  |
| RUNX2    | NM_001024630.1 | 616                  | 0.025   | -0.091 | 586                      | 0.929   | 0.004   | -0.083  | - | 0.091  |
| OSBPL10  | NM_017784.3    | 616                  | 0.028   | -0.089 | 586                      | 0.267   | -0.050  | -0.138  | - | 0.038  |
| BCL2L2   | NM_004050.2    | 616                  | 0.029   | 0.088  | 586                      | 0.014   | 0.114   | 0.023   | - | 0.205  |
| MAF1     | NM_032272.3    | 616                  | 0.029   | 0.088  | 586                      | 0.603   | -0.022  | -0.106  | - | 0.062  |
| PARP3    | NM_005485.3    | 616                  | 0.030   | 0.088  | 586                      | 0.382   | 0.037   | -0.046  | - | 0.120  |
| CTDSPL   | NM_005808.2    | 616                  | 0.030   | 0.087  | 586                      | 0.568   | 0.024   | -0.058  | - | 0.106  |
| KLHL20   | NM_014458.3    | 616                  | 0.030   | -0.088 | 586                      | 0.782   | -0.012  | -0.101  | - | 0.076  |
| CHD7     | NM_017780.2    | 616                  | 0.031   | -0.087 | 586                      | 0.747   | 0.015   | -0.075  | - | 0.104  |
| CCDC69   | NM_015621.2    | 616                  | 0.032   | 0.087  | 586                      | 0.013   | 0.106   | 0.023   | - | 0.190  |
| TRAK1    | NM_001042646.1 | 616                  | 0.032   | 0.086  | 586                      | 0.013   | 0.109   | 0.023   | - | 0.194  |
| CCDC43   | NM_144609.1    | 616                  | 0.032   | 0.086  | 586                      | 0.014   | 0.102   | 0.021   | - | 0.182  |
| CS       | NM_004077.2    | 616                  | 0.032   | 0.086  | 586                      | 0.068   | 0.078   | -0.006  | - | 0.161  |
| MEA1     | NM_014623.2    | 616                  | 0.032   | 0.086  | 586                      | 0.146   | 0.062   | -0.021  | - | 0.145  |

|          |                |     |       |        |     |       |        |        |   |        |
|----------|----------------|-----|-------|--------|-----|-------|--------|--------|---|--------|
| LUZP1    | NM_033631.2    | 616 | 0.032 | 0.086  | 586 | 0.456 | 0.032  | -0.053 | - | 0.117  |
| LCMT1    | NM_016309.2    | 616 | 0.033 | 0.086  | 586 | 0.014 | 0.105  | 0.021  | - | 0.188  |
| ZC3H10   | NM_032786.1    | 616 | 0.033 | -0.086 | 586 | 0.039 | -0.090 | -0.175 | - | -0.005 |
| RGL1     | NM_015149.2    | 616 | 0.033 | -0.086 | 586 | 0.238 | -0.055 | -0.147 | - | 0.036  |
| EIF1AX   | NM_001412.3    | 616 | 0.034 | -0.085 | 586 | 0.128 | -0.066 | -0.151 | - | 0.019  |
| SEC22C   | NM_032970.2    | 616 | 0.034 | 0.085  | 586 | 0.656 | 0.021  | -0.070 | - | 0.111  |
| KLC1     | NM_005552.3    | 616 | 0.035 | 0.085  | 586 | 0.105 | 0.069  | -0.014 | - | 0.153  |
| FAHD1    | NM_001018104.1 | 616 | 0.035 | 0.085  | 586 | 0.806 | 0.011  | -0.074 | - | 0.096  |
| OCRL     | NM_001587.3    | 616 | 0.036 | 0.085  | 586 | 0.692 | 0.019  | -0.074 | - | 0.112  |
| ARSB     | NM_000046.2    | 616 | 0.038 | 0.084  | 586 | 0.005 | 0.118  | 0.036  | - | 0.201  |
| PROK2    | NM_021935.2    | 616 | 0.038 | -0.083 | 586 | 0.503 | 0.027  | -0.053 | - | 0.108  |
| CD40LG   | NM_000074.2    | 616 | 0.039 | -0.083 | 586 | 0.651 | -0.019 | -0.102 | - | 0.064  |
| GALNT10  | NM_198321.2    | 616 | 0.042 | 0.082  | 586 | 0.042 | 0.097  | 0.004  | - | 0.191  |
| JMJD1C   | NM_004241.2    | 616 | 0.042 | -0.082 | 586 | 0.817 | 0.010  | -0.075 | - | 0.095  |
| FAM104A  | NM_032837.1    | 616 | 0.043 | 0.081  | 586 | 0.308 | -0.046 | -0.135 | - | 0.042  |
| PPAPDC1B | NM_032483.2    | 616 | 0.044 | 0.081  | 586 | 0.041 | 0.096  | 0.004  | - | 0.187  |
| ATP5A1   | NM_004046.4    | 616 | 0.044 | 0.081  | 586 | 0.049 | 0.092  | 0.001  | - | 0.184  |
| LGR6     | NM_001017403.1 | 616 | 0.044 | 0.081  | 586 | 0.075 | 0.077  | -0.008 | - | 0.162  |
| NRSN2    | NM_024958.1    | 616 | 0.045 | 0.081  | 586 | 0.927 | 0.004  | -0.089 | - | 0.098  |
| SHCBP1   | NM_024745.2    | 616 | 0.047 | 0.080  | 586 | 0.020 | 0.105  | 0.017  | - | 0.194  |
| SLC7A5   | NM_003486.5    | 616 | 0.047 | 0.080  | 586 | 0.651 | -0.021 | -0.112 | - | 0.070  |
| MLLT10   | NM_004641.2    | 616 | 0.050 | -0.079 | 586 | 0.634 | 0.021  | -0.067 | - | 0.110  |

\***Model:** Stepwise linear regression model with hsa-miR-122-5p (forced in the model), age, sex, BMI, liver status, alanine aminotransferase (ALT), aspartate aminotransferase (AST) and gamma-glutamyltransferase (GT). **Note:** Individuals with ALT, AST or GT levels over the Finnish reference ranges were discarded from the analysis.
